# Supplementary material for: miR-4759 suppresses breast cancer through immune checkpoint blockade
Source: PubMed Central journal article supplement — Comput Struct Biotechnol J. 2021 Dec 16;20:241–51. doi: 10.1016/j.csbj.2021.12.020 (PMC8718579; doi:10.1016/j.csbj.2021.12.020), 2021-12-16
Supplement: mmc1.pdf [file mmc1.pdf]

# Supplementary Table S1. Summary of immune checkpoint genes

| Genes                         | Ligand                              | expressed                                                                                    | function                                                                                                                                                                        | reference |
|-------------------------------|-------------------------------------|----------------------------------------------------------------------------------------------|---------------------------------------------------------------------------------------------------------------------------------------------------------------------------------|-----------|
| <b>B7-1 (CD80)</b>            | CD28, CTLA-4, PD-L1                 | dendritic cells, macrophages, B-cells, and other antigen-presenting cells                    | suppresses dendritic cells, also promotes suppressive effects of regulatory T cells. PD-L1 binds to CD80 in cis on APC cells, preventing CD80 from activating T cells via CD28. | 29, 30    |
| <b>B7-2 (CD86)</b>            | CD28, CTLA-4                        | dendritic cells, macrophages, B-cells, and other antigen-presenting cells                    | impairs the co-stimulation necessary for proper T-cell activation.                                                                                                              | 31        |
| <b>HHLA2</b>                  | TMIGD2                              | Tumor cells, monocytes                                                                       | Inhibits the proliferation of T cells                                                                                                                                           | 32        |
| <b>VSIR (VISTA)</b>           | unknown                             | T cells and activated Treg, myeloid cells, mature APC                                        | Increase threshold for TCR signaling, induce FOXP3 synthesis                                                                                                                    | 33        |
| <b>PD-L1 (CD274)</b>          | PD-1, B7-1 (CD80)                   | dendritic cells, monocytes, macrophages, mast cells, T cells, B cells, NK cells              | inhibits TCR-mediated activation of IL-2 production and T cell proliferation.                                                                                                   | 34        |
| <b>PDCD1LG2</b>               | PD-1                                | dendritic cells and macrophages                                                              | inhibits TCR/BCR-mediated immune cell activation                                                                                                                                | 34        |
| <b>B7-H3 (CD276)</b>          | unknown                             | antigen-presenting cells                                                                     | inhibits polyclonal or allogeneic CD4 and CD8 T cell activation, proliferation and effector cytokine production                                                                 | 35        |
| <b>VTCN1(B7-H4)</b>           | BTLA                                | tumor cells and tumor-associated macrophages                                                 | increase the number, function, and stability of tumor-associated Treg cells.                                                                                                    | 36        |
| <b>CD48</b>                   | CD244, CD2                          | T cells, B cells, NK cells and thymocytes.                                                   | depletion of memory cells and inhibition of T cell activation                                                                                                                   | 37        |
| <b>NECTIN2 (CD112, PVRL2)</b> | CD226, PVRIG (CD112R)               | antigen-presenting cells                                                                     | diminishes IFN- $\gamma$ production and cytotoxicity of NK cells                                                                                                                | 38        |
| <b>PVR (CD155)</b>            | CD226, TIGIT, CD96                  | antigen-presenting cells                                                                     | suppresses interferon- $\gamma$ production of NK cells and cytotoxic T cells                                                                                                    | 39, 40    |
| <b>LGALS9</b>                 | TIM-3, CLEC7A, CD137, CD40          | epithelial and stromal cells                                                                 | Attenuates T-cell expansion and effectors function                                                                                                                              | 41        |
| <b>HVEM (TNFRSF14)</b>        | BTLA, TRAF2, TNFSF14, TRAF5         | T cells, B cells and immature dendritic cells                                                | exert inhibitory function and reduce the proliferation ability of antigen-initiating T cells                                                                                    | 42        |
| <b>CD200</b>                  | CD200R                              | Neurons, epithelial cells, endothelial cells, fibroblasts, myeloid cells, and lymphoid cells | Suppresses memory T-cell and NK cell functions                                                                                                                                  | 43, 44    |
| <b>IDO1</b>                   |                                     | cancer cells, stromal cells, and immune cells in the tumor microenvironment                  | limits T-cell function and engage mechanisms of immune tolerance.                                                                                                               | 45        |
| <b>CTLA4</b>                  | B7-1 (CD80), B7-2 (CD86)            | Activated T cells, Treg                                                                      | Competitive inhibition of CD28 co-stimulation (binding of B7-1 and B7-2)                                                                                                        | 46, 47    |
| <b>PD-L1 (CD274)</b>          | PD-1, B7-1 (CD80)                   | dendritic cells, monocytes, macrophages, mast cells, T cells, B cells, NK cells              | inhibits TCR-mediated activation of IL-2 production and T cell proliferation.                                                                                                   | 34        |
| <b>LAG3</b>                   | MHC-II, LSECtin                     | Activated CD4 and CD8 T cells, NK cells, Treg                                                | Competitive binding to MHC-II than CD4, negatively regulates cellular proliferation, activation, and homeostasis of T cells                                                     | 48        |
| <b>B7-1 (CD80)</b>            | CD28, CTLA-4, PD-L1                 | dendritic cells, macrophages, B-cells, and other antigen-presenting cells                    | suppresses dendritic cells, also promotes suppressive effects of regulatory T cells. PD-L1 binds to CD80 in cis on APC cells, preventing CD80 from activating T cells via CD28. | 29, 30    |
| <b>PDCD1</b>                  | PD-L1, PD-L2                        | Activated T cells, NK cells, NKT cells, B cells, macrophages, DCs                            | Attenuate proximal TCR signaling, attenuate CD28 signaling                                                                                                                      | 49        |
| <b>2B4 (CD244)</b>            | CD48                                | NK cell, T cell, eosinophils, mast cells and dendritic cells.                                | maintenance of an exhausted phenotype in NK cells and T cells                                                                                                                   | 50        |
| <b>BTLA (CD272)</b>           | VTCN1, HVEM                         | Activated T cells                                                                            | Binding to HVEM negatively regulates T cell immune response. Recruits SHP-1 and SHP-2 and inhibits signaling cascades.                                                          | 36        |
| <b>CD160</b>                  | HVEM                                | NK cells, T cells                                                                            | inhibits CD4 T cell proliferation and cytokine production.                                                                                                                      | 51        |
| <b>HAVCR2 (TIM3)</b>          | Galectin-9, PtdSer, HMGB1, CEACAM-1 | Th1 CD4 and Tc1 CD8, Treg, DC, NK cells, monocytes                                           | Negative regulation of proximal TCR components, inhibits NK cell cytotoxicity                                                                                                   | 52        |
| <b>CD96</b>                   | PVR                                 | T cells, NK cells                                                                            | CD96 is co-expressed with PD-1 and TIGIT, Anti-CD96 therapy enhances suppression of primary tumor growth. Detailed mechanism unknown.                                           | 53        |
| <b>TIGIT</b>                  | PVR (CD155), PVRL2 (CD112)          | CD4, CD8 T cell, Treg, NK cells                                                              | Competitive inhibition of DNAM1, co-stimulation (binding of PVR), binding of DNAM1 in cis; cell-intrinsic ITIM-negative signaling                                               | 54        |
| <b>ADORA2A</b>                | Adenosine                           | T cells, macrophages, DCs and NK cells                                                       | suppresses immune cells, protecting tissue from inflammation                                                                                                                    | 55        |
| <b>CD200R</b>                 | CD200                               | myeloid cells, CD4+ T cells                                                                  | Suppresses memory T-cell and NK cell functions                                                                                                                                  | 43, 44    |
| <b>PVRIG (CD112R)</b>         | NECTIN2                             | T cells                                                                                      | competes with CD226 to bind to CD112, diminishes IFN- $\gamma$ production and cytotoxicity of NK cells                                                                          | 38        |

**Supplementary Table S2.** Characteristics of breast cancer patients in the TCGA-BRCA cohort.

| <b>Characteristics</b>         | <b>High miR-4759 (n=154)</b> | <b>Low miR-4759* (n=922)</b> |
|--------------------------------|------------------------------|------------------------------|
| Age                            | 57.8 ± 12.4                  | 59.4 ± 13.3                  |
| Gender, n (%)                  |                              |                              |
| Female                         | 150 (97.4%)                  | 912 (98.9%)                  |
| Male                           | 4 (2.6%)                     | 10 (1.1%)                    |
| Histological type, n (%)       |                              |                              |
| Infiltrating ductal carcinoma  | 89 (57.8%)                   | 676 (73.3%)                  |
| Infiltrating lobular carcinoma | 56 (36.4%)                   | 144 (15.6%)                  |
| Infiltrating carcinoma NOS     | 0 (0%)                       | 1 (0.1%)                     |
| Medullary carcinoma            | 0 (0%)                       | 6 (0.7%)                     |
| Metaplastic carcinoma          | 0 (0%)                       | 9 (1.0%)                     |
| Mucinous carcinoma             | 2 (1.3%)                     | 15 (1.6%)                    |
| Mixed histology                | 3 (1.9%)                     | 25 (2.7%)                    |
| Other specify                  | 3 (1.9%)                     | 42 (4.6%)                    |
| Not available (NA)             | 1 (0.6%)                     | 4 (0.4%)                     |
| Pathologic stage, n (%)        |                              |                              |
| Stage I                        | 30 (19.5%)                   | 150 (16.3%)                  |
| Stage II                       | 85 (55.2%)                   | 524 (56.8%)                  |
| Stage III                      | 32 (20.8%)                   | 213 (23.1%)                  |
| Stage IV                       | 5 (3.2%)                     | 15 (1.6%)                    |
| NA                             | 2 (1.3%)                     | 20 (2.2%)                    |
| ER status, n (%)               |                              |                              |
| Positive                       | 133 (86.3%)                  | 658 (71.4%)                  |
| Negative                       | 13 (8.4%)                    | 219 (23.8%)                  |
| NA                             | 8 (5.2%)                     | 45 (4.9%)                    |
| PR status, n (%)               |                              |                              |
| Positive                       | 122 (79.2%)                  | 563 (61.1%)                  |
| Negative                       | 24 (15.6%)                   | 311 (33.7%)                  |
| NA                             | 8 (5.2%)                     | 48 (5.2%)                    |
| HER2 status, n (%)             |                              |                              |
| Positive                       | 75 (48.7%)                   | 475 (51.5%)                  |
| Negative                       | 7 (4.5%)                     | 48 (5.2%)                    |
| NA                             | 72 (46.8%)                   | 399 (43.3%)                  |

\*The cutoff value of high and low expression was set as the average.

### Supplementary Table S3.

Correlation analysis of miR-4759 and immune-related genes in BRCA datasets of TCGA.

| gene  | spearman_cor <sup>1</sup> | spearman_pv <sup>2</sup> | pearson_cor <sup>3</sup> | pearson_pv <sup>4</sup> | kendall_cor <sup>5</sup> | kendall_pv <sup>6</sup> | max_cor <sup>7</sup> | Category                         |
|-------|---------------------------|--------------------------|--------------------------|-------------------------|--------------------------|-------------------------|----------------------|----------------------------------|
| STAT1 | -0.114806472              | 0.000164059              | -0.121682179             | 6.44E-05                | -0.090911873             | 0.000159142             | 0.121682179          | tumor inflammation signature     |
| CD80  | -0.105988357              | 0.000505964              | -0.11186659              | 0.000241002             | -0.083798234             | 0.000499815             | 0.11186659           | immune checkpoint genes          |
| PVR   | -0.117316333              | 0.00011729               | -0.079696659             | 0.009009061             | -0.091472599             | 0.000144904             | 0.117316333          | immune checkpoint genes          |
| CCL7  | -0.154358614              | 3.76E-07                 | -0.081755925             | 0.007375037             | -0.123183795             | 4.79E-07                | 0.154358614          | cytokines and cytokine receptors |
| CCL8  | -0.107368512              | 0.00042649               | -0.090292251             | 0.003073643             | -0.084858738             | 0.000423621             | 0.107368512          | cytokines and cytokine receptors |

<sup>1</sup>spearman\_cor=Spearman's rank correlation coefficient. <sup>2</sup>spearman\_pv=Spearman's rank correlation coefficient p value. <sup>3</sup>pearson\_cor=Pearson's rank correlation coefficient. <sup>4</sup>pearson\_pv=pearson's rank correlation coefficient p value. <sup>5</sup>kendall\_cor=kendall's rank correlation coefficient. <sup>6</sup>kendall\_pv=kendall's rank correlation coefficient p value. <sup>7</sup>max\_cor=maximum coefficient.

A

BT-549

24 hr

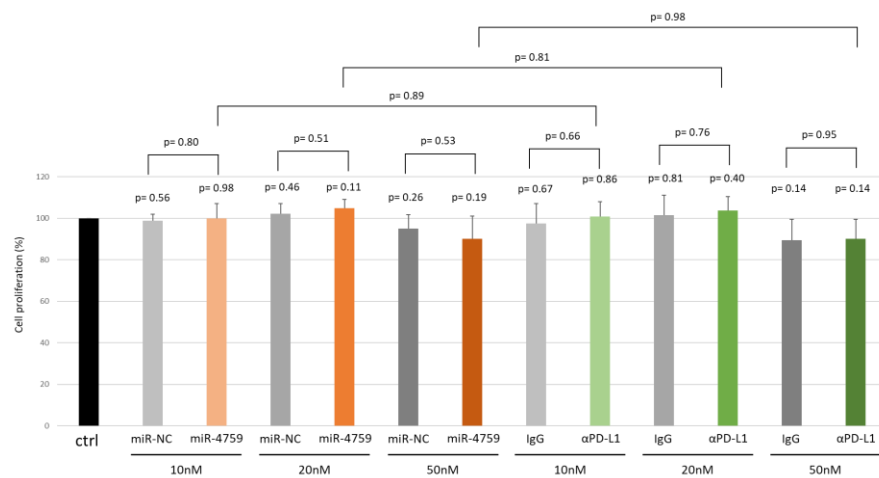

MDA-MB-231

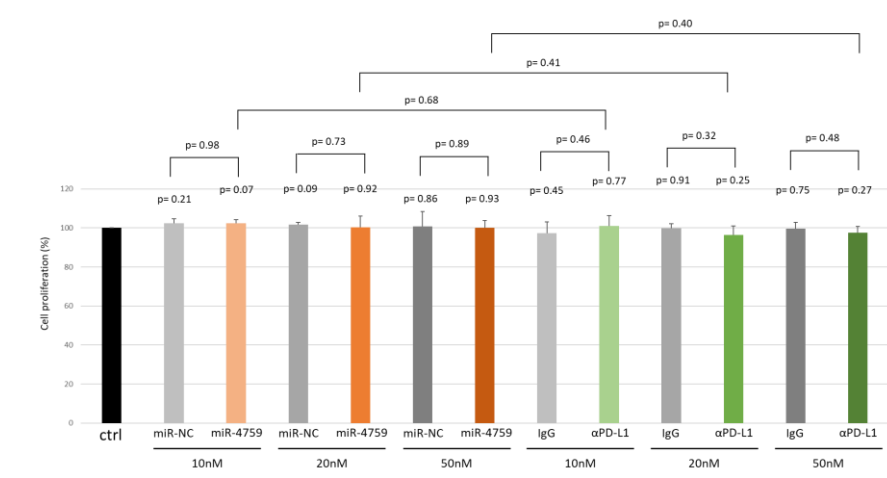

B

48 hr

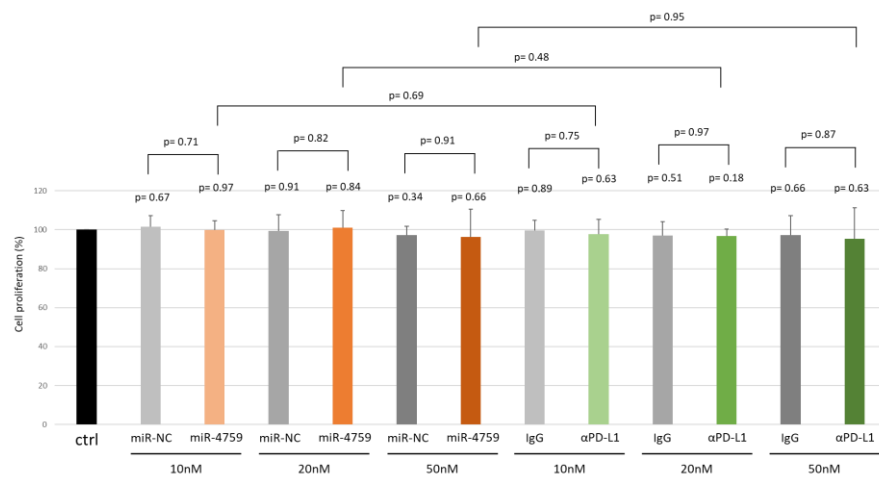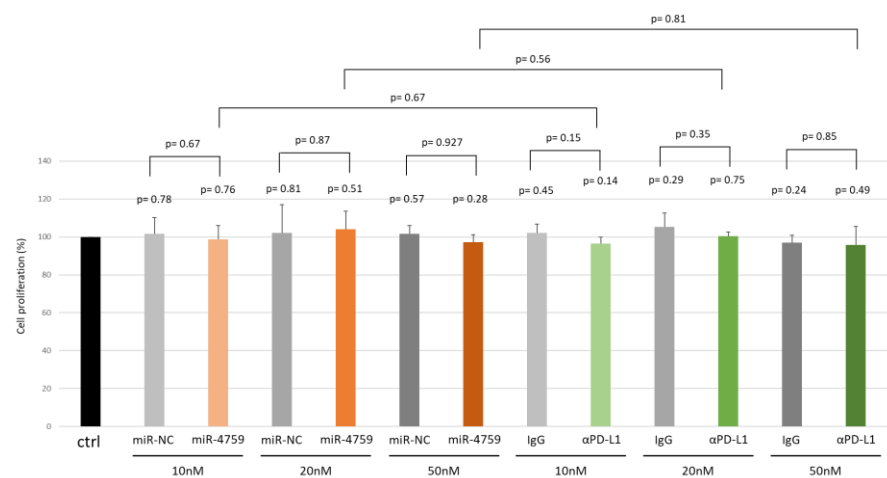

C

72 hr

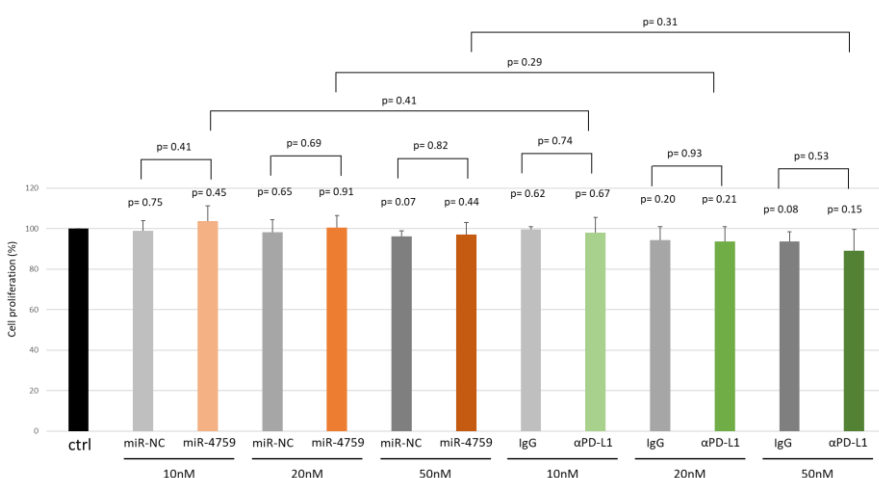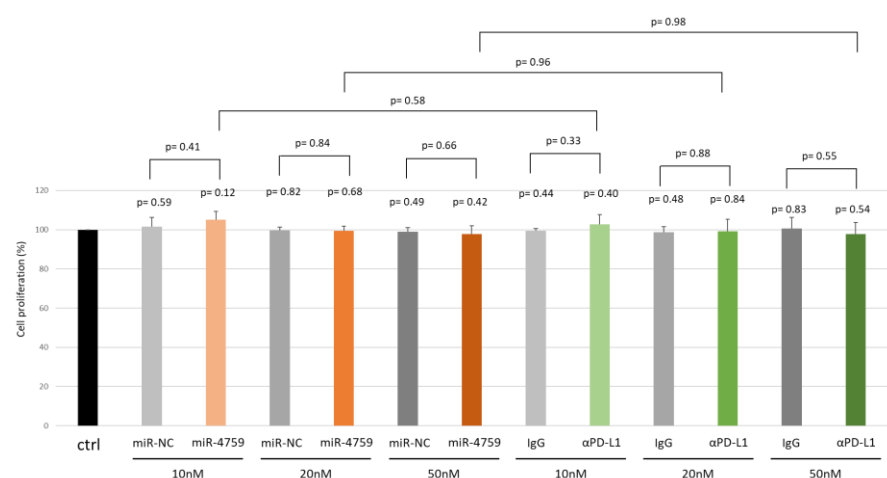

**Supplementary Figure S1.** MTT assay was conducted to measure the cell growth in breast cancer cells with miR-NC/miR-4759 transfection or IgG/anti-PD-L1 treatment for (A) 24 , (B) 48 and (C) 72 hours.

**A**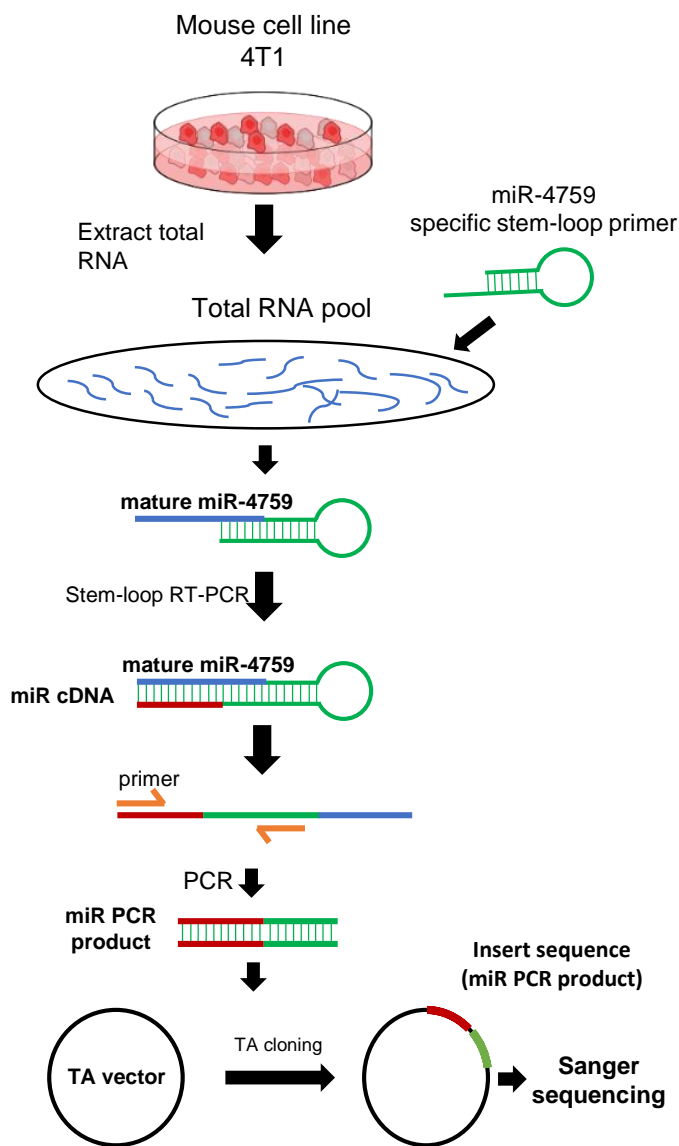**B**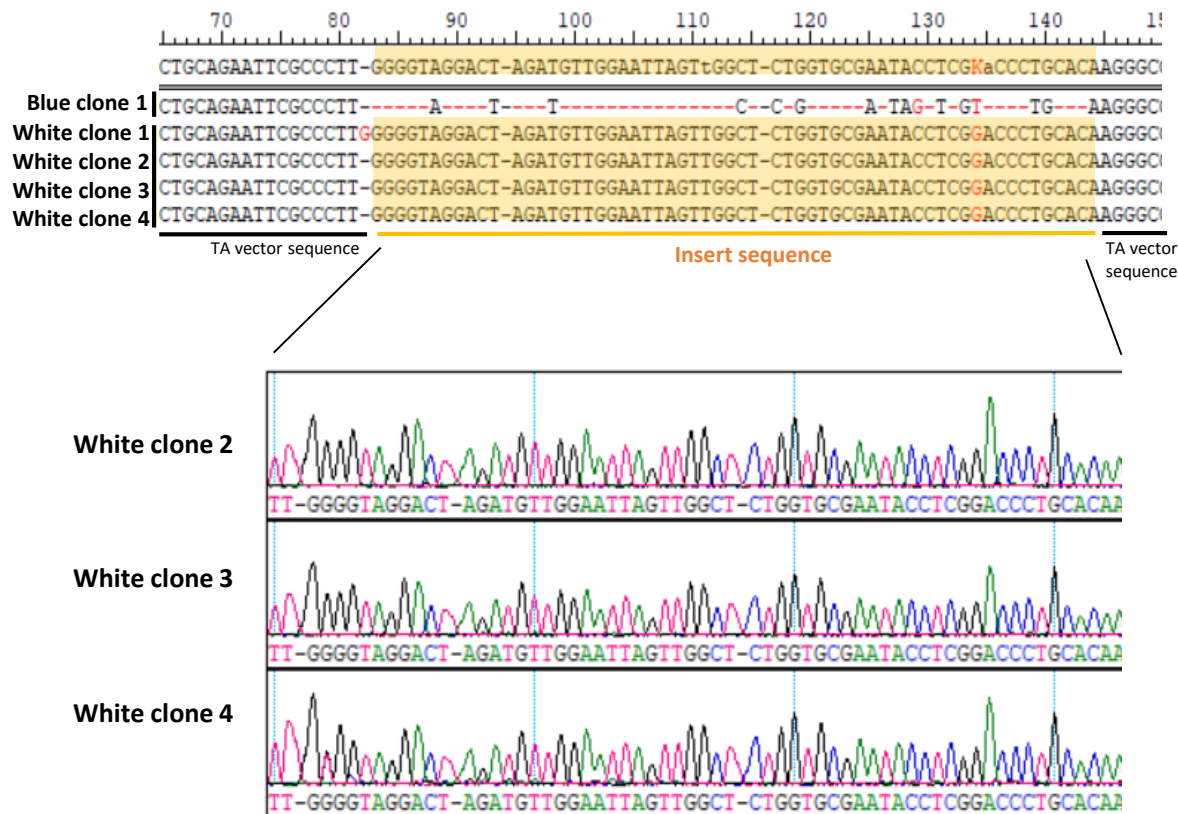**C.**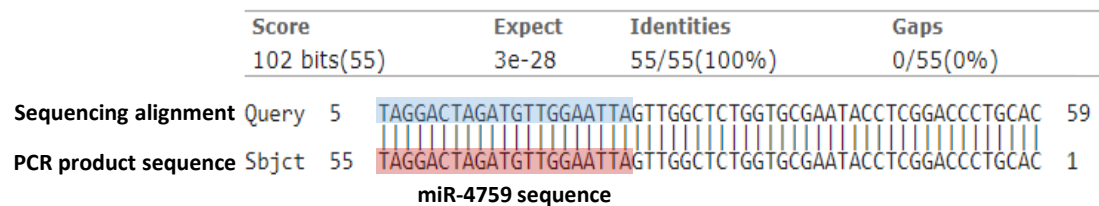

**Supplementary Figure S2.** Identification of miR-4759 in murine cell line 4T1. (A) Schematic diagram of the strategy to identify miR-4759 in 4T1 cells. (B) the alignment and original traces of TA cloning samples sequenced by Sanger method. (C) the miR-4759 sequence is identified by the alignment of sequencing data and PCR product sequence.

**A**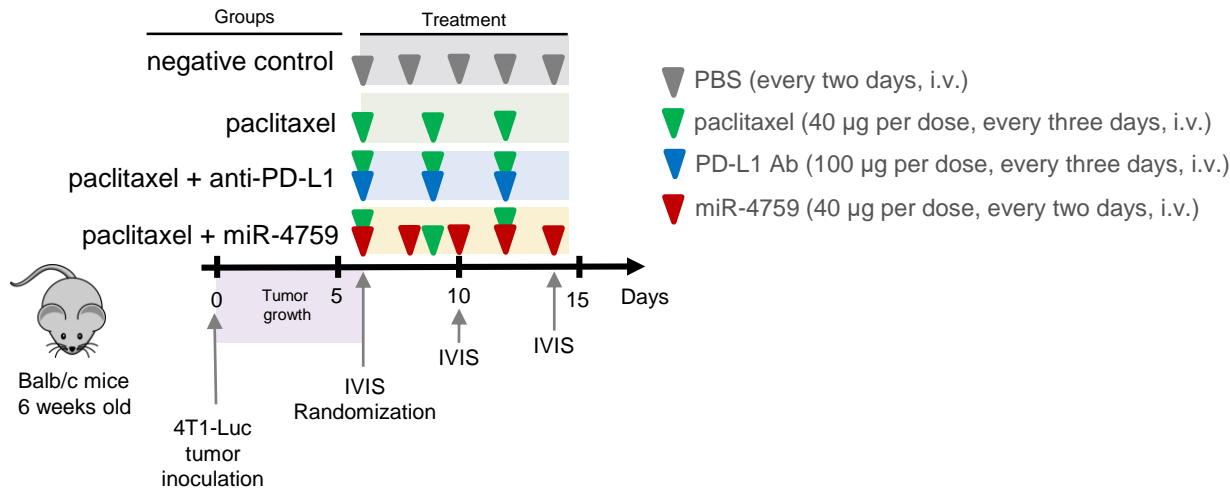**B**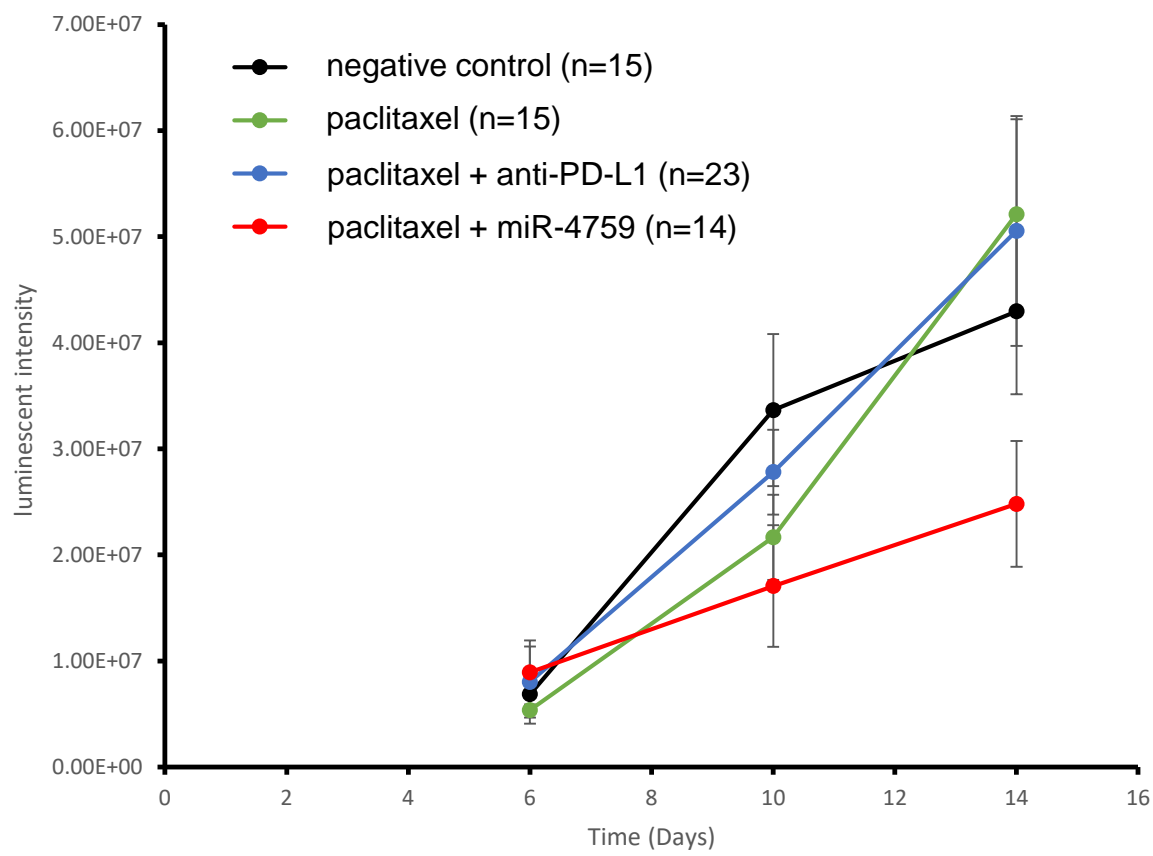**C**

| Comparison                                        | P value     |
|---------------------------------------------------|-------------|
| NC vs. paclitaxel                                 | 0.44        |
| NC vs. paclitaxel + anti-PD-L1                    | 0.61        |
| NC vs. paclitaxel + miR-4759                      | 0.12        |
| paclitaxel vs. paclitaxel + anti-PD-L1            | 0.92        |
| paclitaxel vs. paclitaxel + miR-4759              | <b>0.03</b> |
| paclitaxel + anti-PD-L1 vs. paclitaxel + miR-4759 | 0.11        |

**Supplementary Figure S3.** miR-4759 systemic treatment combined with chemotherapy in 4T1-Luc tumor-bearing mice. (A) Schematic diagram illustrating the protocol of combination treatment of paclitaxel and miR-4759 in BALB/c mice bearing 4T1-Luc tumors. (B) 4T1-Luc tumor growth in BALB/c mice treated with different treatments. (C) Comparison of tumor growth in 4T1-luc tumor bearing Balb/c mice received with different treatments at Day 14.

**Supplementary Table S4.** Characteristics of breast cancer patients in the TMA cohort.

| <b>Characteristics</b>  | <b>High miR-4759<br/>(n=50)</b> | <b>Low miR-4759*<br/>(n=131)</b> |
|-------------------------|---------------------------------|----------------------------------|
| Age                     | 49.1 ± 11.9                     | 46.5 ± 10.5                      |
| Gender, n (%)           |                                 |                                  |
| Female                  | 50 (100%)                       | 131 (100%)                       |
| Male                    | 0 (0.0%)                        | 0 (0.0%)                         |
| Pathologic stage, n (%) |                                 |                                  |
| Stage I                 | 3 (6.0%)                        | 9 (6.9%)                         |
| Stage II                | 26 (52.0%)                      | 34 (26.0%)                       |
| Stage III               | 7 (14.0%)                       | 13 (10.0%)                       |
| Stage IV                | 0 (0.0%)                        | 0 (0.0%)                         |
| NA                      | 14 (28%)                        | 75 (57.2%)                       |
| ER status, n (%)        |                                 |                                  |
| Positive                | 32 (64.0%)                      | 87 (66.4%)                       |
| Negative                | 17 (34.0%)                      | 42 (32.1%)                       |
| NA                      | 1 (2.0%)                        | 2 (1.5%)                         |
| PR status, n (%)        |                                 |                                  |
| Positive                | 25 (50.0%)                      | 70 (53.4%)                       |
| Negative                | 24 (48.0%)                      | 60 (45.8%)                       |
| NA                      | 1 (2.0%)                        | 1 (0.8%)                         |
| HER2 status, n (%)      |                                 |                                  |
| Positive                | 32 (64.0%)                      | 58 (44.3%)                       |
| Negative                | 18 (36.0%)                      | 70 (53.4%)                       |
| NA                      | 0 (0.0%)                        | 3 (2.3%)                         |
| Site, n (%)             |                                 |                                  |
| Primary                 | 40 (80.0%)                      | 110 (84.0%)                      |
| Metastasis              | 10 (20.0%)                      | 21 (16.0%)                       |

\*The cutoff value of high and low expression was set as the average.
